# Supplementary material for: Racial, ethnic, and income disparities in air pollution: A study of excess emissions in Texas
Source: PubMed Central journal article supplement (PMC6677308; doi:10.1371/journal.pone.0220696), 2019-08-02
Supplement: pone.0220696.s001.pdf [file pone.0220696.s001.pdf]

**Table A: Descriptive Statistics of Census Tract-Year Demographic Variables**

| Statistics                            | Census Tract Type      |       |                       |       |                    |       |
|---------------------------------------|------------------------|-------|-----------------------|-------|--------------------|-------|
|                                       | Type 1<br>(N = 47,746) |       | Type 2<br>(N = 4,880) |       | Type3<br>(N =3910) |       |
|                                       | Mean                   | S.D.  | Mean                  | S.D.  | Mean               | S.D.  |
| % Black (0-100)                       | 11.60                  | 17.02 | 13.74                 | 18.11 | 9.61               | 13.90 |
| % Hispanics (0-100)                   | 34.68                  | 28.41 | 29.88                 | 25.22 | 29.34              | 24.84 |
| Population Density (per acre)         | 4.97                   | 4.65  | 1.89                  | 2.69  | 0.67               | 1.43  |
| % College Graduate (0-100)            | 25.37                  | 18.88 | 18.67                 | 14.03 | 15.80              | 10.80 |
| Median Household Income (\$1,000)     | 50.10                  | 26.34 | 43.71                 | 18.27 | 44.08              | 15.44 |
| Median Housing Value (\$,1000)        | 119.84                 | 90.34 | 95.13                 | 55.67 | 86.81              | 46.96 |
| % Owner-occupied Housing Unit (0-100) | 64.53                  | 21.76 | 66.33                 | 20.80 | 73.43              | 15.42 |

**Table B: Descriptive Statistics of Emissions and Facility-Year Demographic Variables**

| Statistics                        | Facility Type                                         |           |                                                      |           |
|-----------------------------------|-------------------------------------------------------|-----------|------------------------------------------------------|-----------|
|                                   | Facility with Excess<br>Emissions = 0<br>(N = 12,974) |           | Facility with Excess<br>Emissions > 0<br>(N = 8,441) |           |
|                                   | Mean                                                  | S.D.      | Mean                                                 | S.D.      |
| % Black (0-100)                   | 11.67                                                 | 14.40     | 8.60                                                 | 12.61     |
| % Hispanics (0-100)               | 29.86                                                 | 23.23     | 31.88                                                | 23.90     |
| Population Density (per acre)     | 1.30                                                  | 2.06      | 0.61                                                 | 1.25      |
| % College Graduate (0-100)        | 17.00                                                 | 11.38     | 14.89                                                | 9.21      |
| Median Household Income (\$1,000) | 44.50                                                 | 15.78     | 44.84                                                | 14.04     |
| Median Housing Value (\$,1000)    | 92.44                                                 | 48.54     | 85.65                                                | 40.55     |
| % Owner-occupied Housing (0-100)  | 68.56                                                 | 17.52     | 72.40                                                | 13.60     |
| Routine Emissions (pounds)        | 2974.78                                               | 145057.60 | 29143.09                                             | 524962.20 |
| Excess Emissions (pounds)         |                                                       |           | 173.44                                               | 3669.09   |

Note: Excess emissions consist of EE emissions and SMSS emissions. Facilities started to report them separately to EI from 2004. Thus, breakdown of excess emissions into the two categories for the entire 2000 – 2010 period is not possible. For the period 2004 – 2010, facility-year observations with positive excess emissions have average EE emissions of 102 pounds (s.d. = 1,800) and average SMSS emissions of 81 pounds (s.d. = 3052).

**Table C: Multinomial Logit Average Marginal Effects (3-type Categorization of Census Tract-Year Observations)**

| Average Marginal Effects              |         | Pr (Type 1) | Pr (Type 2) | Pr (Type 3) |
|---------------------------------------|---------|-------------|-------------|-------------|
| % Black (0-100)                       |         |             |             |             |
|                                       | + SD    | -0.010      | 0.007       | 0.002       |
|                                       | p-value | 0.000       | 0.000       | 0.113       |
| % Hispanic (0-100)                    |         |             |             |             |
|                                       | + SD    | 0.003       | -0.004      | 0.001       |
|                                       | p-value | 0.095       | 0.003       | 0.294       |
| Population Density (per acre)         |         |             |             |             |
|                                       | + SD    | 0.126       | -0.060      | -0.066      |
|                                       | p-value | 0.000       | 0.000       | 0.000       |
| % College Graduate (0-100)            |         |             |             |             |
|                                       | + SD    | 0.059       | -0.027      | -0.032      |
|                                       | p-value | 0.000       | 0.000       | 0.000       |
| Median Household Income (\$1,000)     |         |             |             |             |
|                                       | + SD    | -0.069      | 0.012       | 0.057       |
|                                       | p-value | 0.000       | 0.002       | 0.000       |
| Median Housing Value (\$1,000)        |         |             |             |             |
|                                       | + SD    | 0.027       | 0.001       | -0.028      |
|                                       | p-value | 0.000       | 0.810       | 0.000       |
| % Owner-occupied Housing Unit (0-100) |         |             |             |             |
|                                       | + SD    | 0.047       | -0.028      | -0.020      |
|                                       | p-value | 0.000       | 0.000       | 0.000       |

**Table D: Multinomial Logit Average Marginal Effects (4-type Categorization of Census Tract-Year Observations)**

| Average Marginal Effects              |         |             |             |             |             |
|---------------------------------------|---------|-------------|-------------|-------------|-------------|
|                                       |         | Pr (Type 1) | Pr (Type 2) | Pr (Type 3) | Pr (Type 4) |
| % Black (0-100)                       |         |             |             |             |             |
|                                       | + SD    | -0.010      | 0.007       | 0.002       | 0.001       |
|                                       | p-value | 0.000       | 0.000       | 0.218       | 0.291       |
| % Hispanic (0-100)                    |         |             |             |             |             |
|                                       | + SD    | 0.003       | -0.004      | -0.001      | 0.002       |
|                                       | p-value | 0.109       | 0.003       | 0.578       | .           |
| Population Density (per acre)         |         |             |             |             |             |
|                                       | + SD    | 0.126       | -0.060      | -0.055      | -0.011      |
|                                       | p-value | 0.000       | 0.000       | 0.000       | 0.000       |
| % College Graduate (0-100)            |         |             |             |             |             |
|                                       | + SD    | 0.057       | -0.027      | -0.021      | -0.009      |
|                                       | p-value | 0.000       | 0.000       | 0.000       | 0.000       |
| Median Household Income (\$1,000)     |         |             |             |             |             |
|                                       | + SD    | -0.080      | 0.009       | 0.022       | 0.049       |
|                                       | p-value | 0.000       | 0.017       | 0.000       | 0.000       |
| Median Housing Value (\$1,000)        |         |             |             |             |             |
|                                       | + SD    | 0.027       | 0.001       | -0.022      | -0.006      |
|                                       | p-value | 0.000       | 0.836       | 0.000       | 0.000       |
| % Owner-occupied Housing Unit (0-100) |         |             |             |             |             |
|                                       | + SD    | 0.047       | -0.028      | -0.014      | -0.005      |
|                                       | p-value | 0.000       | 0.000       | 0.000       | 0.000       |

**Figure A: Multinomial Logit Average Marginal Effects (4-type Categorization of Census Tract-Year Observations)**

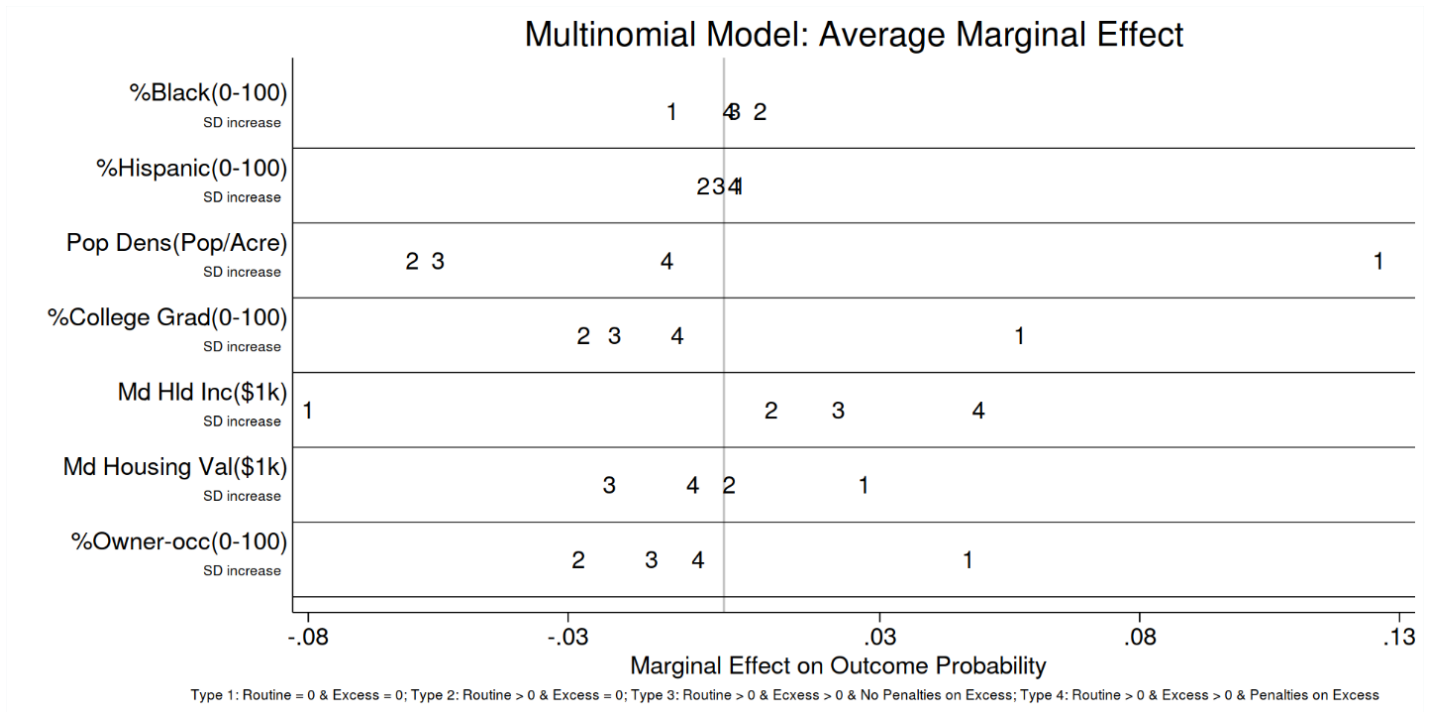

**Table E: Multinomial Logit Average Marginal Effects (5-type Categorization of Census Tract-Year Observations)**

| Average Marginal Effects              |             |             |             |             |             |  |
|---------------------------------------|-------------|-------------|-------------|-------------|-------------|--|
|                                       | Pr (Type 1) | Pr (Type 2) | Pr (Type 3) | Pr (Type 4) | Pr (Type 5) |  |
| % Black (0-100)                       |             |             |             |             |             |  |
| + SD                                  | -0.011      | 0.008       | 0.001       | 0.003       | -0.001      |  |
| p-value                               | 0.000       | 0.000       | 0.138       | 0.001       | 0.424       |  |
| % Hispanic (0-100)                    |             |             |             |             |             |  |
| + SD                                  | 0.000       | -0.004      | -0.002      | -0.001      | 0.007       |  |
| p-value                               | 0.985       | 0.026       | 0.016       | 0.386       | 0.000       |  |
| Population Density (per acre)         |             |             |             |             |             |  |
| + SD                                  | 0.127       | -0.057      | -0.017      | -0.014      | -0.038      |  |
| p-value                               | 0.000       | 0.000       | 0.000       | 0.000       | 0.000       |  |
| % College Graduate (0-100)            |             |             |             |             |             |  |
| + SD                                  | 0.059       | -0.023      | -0.010      | -0.006      | -0.021      |  |
| p-value                               | 0.000       | 0.000       | 0.000       | 0.000       | 0.000       |  |
| Median Household Income (\$1,000)     |             |             |             |             |             |  |
| + SD                                  | -0.082      | 0.010       | 0.005       | 0.013       | 0.053       |  |
| p-value                               | 0.000       | 0.021       | 0.083       | 0.000       | 0.000       |  |
| Median Housing Value (\$1,000)        |             |             |             |             |             |  |
| + SD                                  | 0.026       | 0.000       | -0.001      | -0.006      | -0.019      |  |
| p-value                               | 0.000       | 0.965       | 0.651       | 0.000       | 0.000       |  |
| % Owner-occupied Housing Unit (0-100) |             |             |             |             |             |  |
| + SD                                  | 0.048       | -0.026      | -0.002      | -0.007      | -0.013      |  |
| p-value                               | 0.000       | 0.000       | 0.166       | 0.000       | 0.000       |  |

**Figure B: Multinomial Logit Average Marginal Effects (5-type Categorization of Census Tract-Year Observations)**

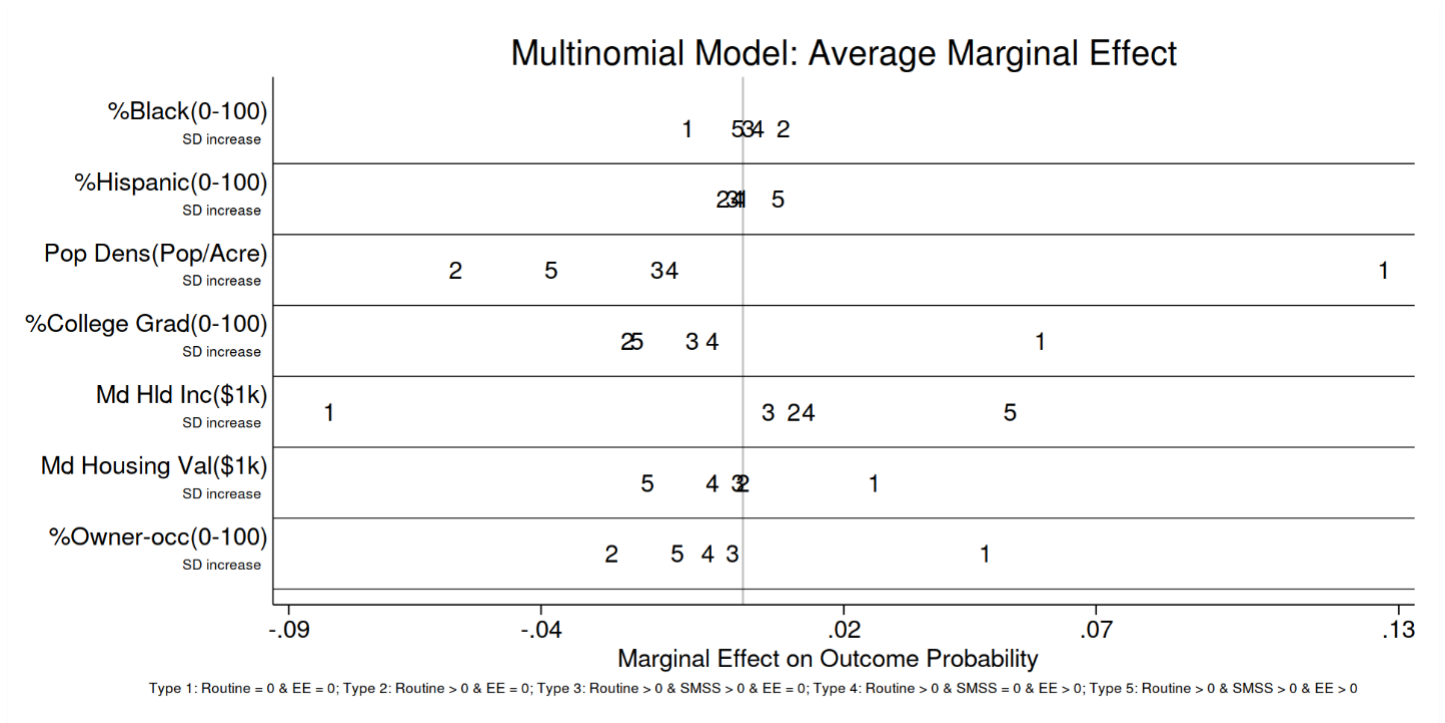

**Table F: Facility Level Analysis (3-mile Buffer)**

|                              | Facility Level: Logit Model and OLS Model AME |                       |                       |                       |                       |                       |
|------------------------------|-----------------------------------------------|-----------------------|-----------------------|-----------------------|-----------------------|-----------------------|
|                              | (1)                                           |                       | (2)                   |                       | (3)                   |                       |
|                              | Logit                                         | OLS                   | Logit                 | OLS                   | Logit                 | OLS                   |
| % Black (0-100)              | -0.0004<br>(0.0003)                           | 0.0190**<br>(0.0031)  | 0.0001<br>(0.0004)    | 0.0151**<br>(0.0041)  | -0.0003<br>(0.0004)   | 0.0149**<br>(0.0044)  |
| % Hispanics (0-100)          | 0.0007**<br>(0.0002)                          | 0.0058**<br>(0.0017)  | 0.0006<br>(0.0004)    | -0.0017<br>(0.0040)   | 0.0003<br>(0.0004)    | -0.0045<br>(0.0043)   |
| Ln (Population Density)      | -0.0158**<br>(0.0022)                         | -0.1140**<br>(0.0216) | -0.0117**<br>(0.0040) | -0.1010**<br>(0.0410) | -0.0112**<br>(0.0041) | -0.0932**<br>(0.0435) |
| % College Grad (0-100)       | -0.0011**<br>(0.0005)                         | -0.0107*<br>(0.0055)  | -0.0003<br>(0.0008)   | -0.0133*<br>(0.0075)  | 0.0002<br>(0.0008)    | -0.0187**<br>(0.0081) |
| Ln (Md Hld Inc)              | 0.1080**<br>(0.0225)                          | 1.5240**<br>(0.2160)  | 0.0934**<br>(0.0361)  | 1.4790**<br>(0.3470)  | 0.0137<br>(0.0416)    | 1.5380**<br>(0.4140)  |
| Ln (Md Housing Val)          | -0.0234<br>(0.0151)                           | -0.8000**<br>(0.1520) | -0.0224<br>(0.0237)   | -0.4470*<br>(0.2420)  | 0.0005<br>(0.0266)    | -0.427<br>(0.2830)    |
| % Owner-occ Hou (0-100)      | -0.0021**<br>(0.0004)                         | 0.0080**<br>(0.0040)  | -0.0020**<br>(0.0005) | -0.0143**<br>(0.0055) | -0.0015**<br>(0.0006) | -0.0166**<br>(0.0061) |
| Ln (Routine Emissions)       | 0.0669**<br>(0.0019)                          | 0.5200**<br>(0.0174)  | 0.0607**<br>(0.0020)  | 0.5130**<br>(0.0174)  | 0.0656**<br>(0.0021)  | 0.5330**<br>(0.0185)  |
| Industry Fixed Effects       | X                                             | X                     | X                     | X                     | X                     | X                     |
| Year Fixed Effects           | X                                             | X                     | X                     | X                     |                       |                       |
| County Fixed Effects         |                                               |                       | X                     | X                     |                       |                       |
| County by Year Fixed Effects |                                               |                       |                       |                       | X                     | X                     |
| N                            | 20,349                                        | 8,439                 | 20,203                | 8,439                 | 18,669                | 8,439                 |

Note: Standard errors in parentheses. Statistical significance levels: \*  $p < 0.10$ , \*\*  $p < 0.05$
